# Supplementary material for: Fabrication of calcium phosphate microcapsules using emulsion droplets stabilized with branched copolymers as templates
Source: Royal Society of Chemistry journal article supplement (doi:10.1039/c5tb00893j), 2015-01-01
Supplement: c5tb00893j1.pdf [file c5tb00893j1.pdf]

## Electronic Supplementary Information (ESI)

### Fabrication of Calcium Phosphate Microcapsules using Emulsion Droplets Stabilized with Branched Copolymers as Templates

Robert V. Bell,<sup>ab</sup> Luke A. Rochford,<sup>a</sup> Rafael T. M. de Rosales,<sup>c</sup> Molly Stevens,<sup>b</sup> Jonathan V. M. Weaver,<sup>b†</sup> and Stefan A. F. Bon<sup>\*a</sup>

<sup>a</sup>Department of Chemistry, University of Warwick, Coventry CV4 7AL, UK.

<sup>b</sup>Department of Materials, Imperial College London, Exhibition Road, London SW7 2AZ, UK.

<sup>c</sup>Division of Imaging Sciences & Biomedical Engineering, King's College London, 4<sup>th</sup> Floor, Lambeth Wing, St. Thomas' Hospital, London SE1 7EH, UK.

<sup>†</sup>Deceased

\*Email: S.Bon@warwick.ac.uk

#### Content

|                                                         |         |
|---------------------------------------------------------|---------|
| 1. Characterization of Branched Copolymer (BCP)         | Page S2 |
| 2. Potentiometric Titration of BCP                      | Page S4 |
| 3. Emulsion Characterization                            | Page S5 |
| 4. Characterization of Calcium Phosphate (CaP) Capsules | Page S6 |
| 4.1. FTIR                                               | Page S6 |
| 4.2. ICP-OES                                            | Page S7 |
| 4.3. TGA                                                | Page S7 |
| 4.4. XRD                                                | Page S8 |
| 5. Fluorescent Capsules                                 | Page S8 |

## 1. Characterization of Branched Copolymer (BCP)

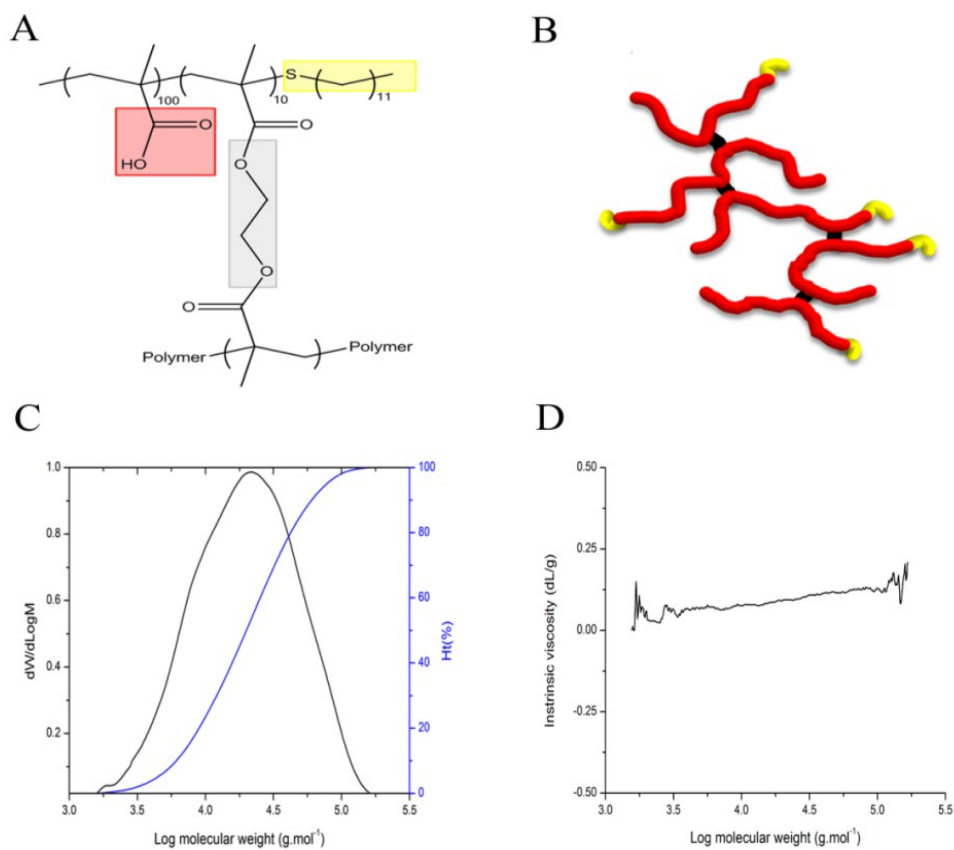

**Fig. S1** (A) Chemical structure of the BCP. (B) Schematic illustration of the BCP architecture. The red colour represents the main domain of the BCP, MAA, the black colour represents the branching unit, EGDMA, and the yellow colour represents the hydrophobic chain ends, DDT. The TD-GPC chromatograms of the BCP: (C) molecular weight distribution of the BCP, and (D) Mark-Houwink plot of the BCP.

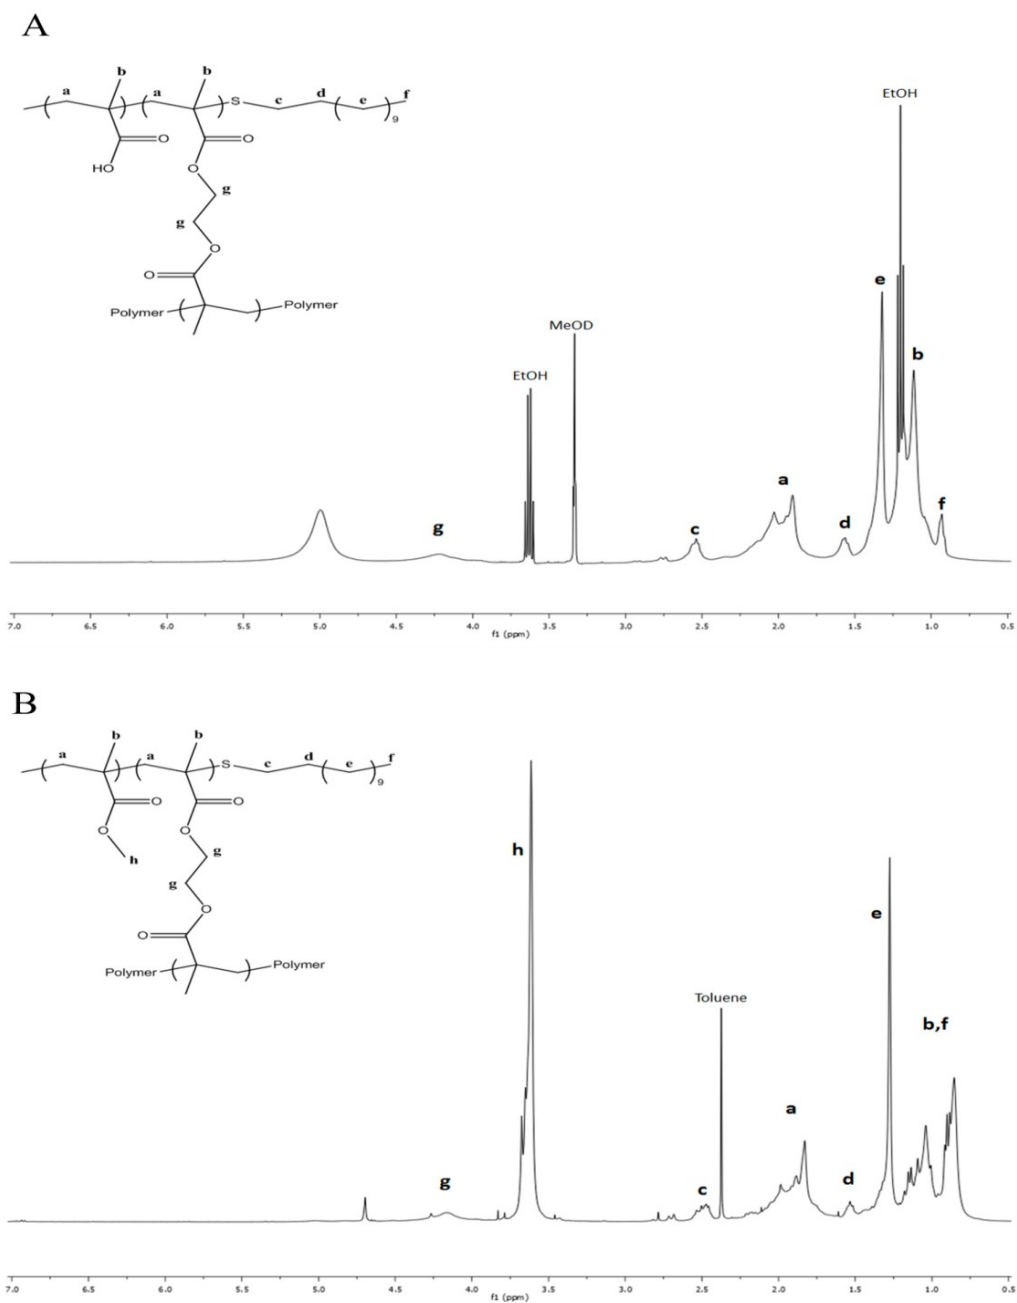

**Fig. S2**  $^1\text{H}$  NMR spectra of (A) BCP in  $\text{CD}_3\text{OD}$ , and (B) esterified BCP in  $\text{CDCl}_3$ .

**Table S1** Composition and molecular parameters of the BCP

| Target polymer composition <sup>a</sup>                    | Actual polymer composition <sup>b</sup>                      | Conversion (%) <sup>c</sup> | $M_n$ ( $\text{g}\cdot\text{mol}^{-1}$ ) <sup>d</sup> | $M_w$ ( $\text{g}\cdot\text{mol}^{-1}$ ) <sup>d</sup> | $\bar{D}^d$ | $\alpha^d$ |
|------------------------------------------------------------|--------------------------------------------------------------|-----------------------------|-------------------------------------------------------|-------------------------------------------------------|-------------|------------|
| MAA <sub>100</sub> -EGDMA <sub>10</sub> -DDT <sub>10</sub> | MAA <sub>100</sub> -EGDMA <sub>8.7</sub> -DDT <sub>9.2</sub> | 97                          | 13246                                                 | 27600                                                 | 2.08        | 0.23       |

<sup>a</sup> Target molar equivalent based on monofunctional monomer nominally set to 100. <sup>b</sup> Polymer composition was calculated from  $^1\text{H}$  NMR spectrum of the esterified BCP. <sup>c</sup> Polymer conversion was calculated by  $^1\text{H}$  NMR. <sup>d</sup> Measured by triple-detection GPC in DMF eluent.

## 2. Potentiometric Titration of BCP

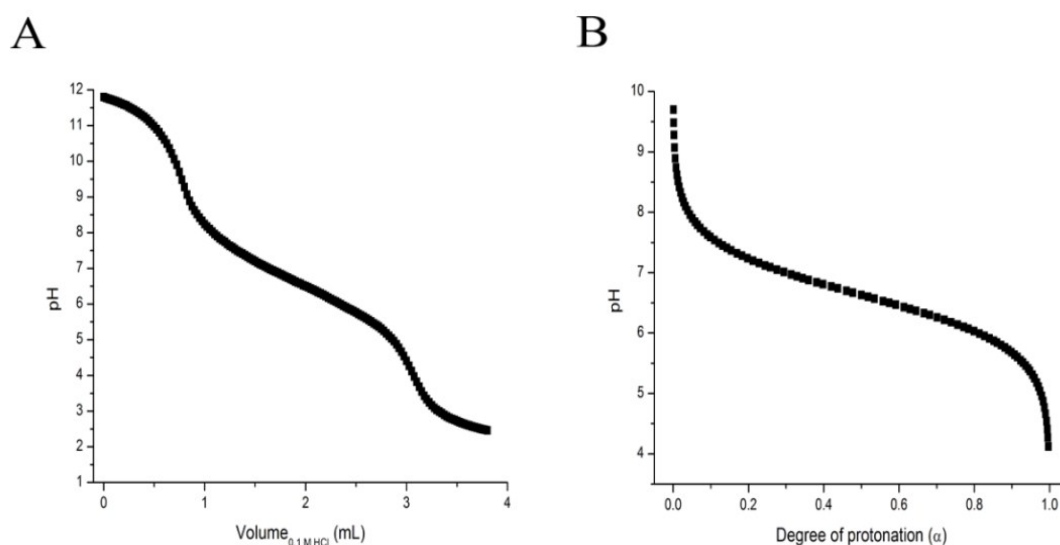

**Fig. S3** (A) Acid-base titration curve obtained for BCP, and (B) degree of protonation of BCP with pH.

The degree of protonation ( $\alpha$ ) of BCP with pH was calculated from the Henderson-Hasselbalch equation. From the acid-based titration curve of the BCP (Fig. S3A), it was found that BCP buffered the solution in the pH range of 10 – 3.5. The titration curve indicated a significant buffering effect of the BCP around pH 6. The overall degree of protonation ( $\alpha$ ) of the MAA domain in BCP increased from zero to unity as the solution pH decreased from 9.70 to 4.12 (Fig. S3B). It was determined that the  $pK_a$  of BCP was 6.63.

### 3. Emulsion Characterization

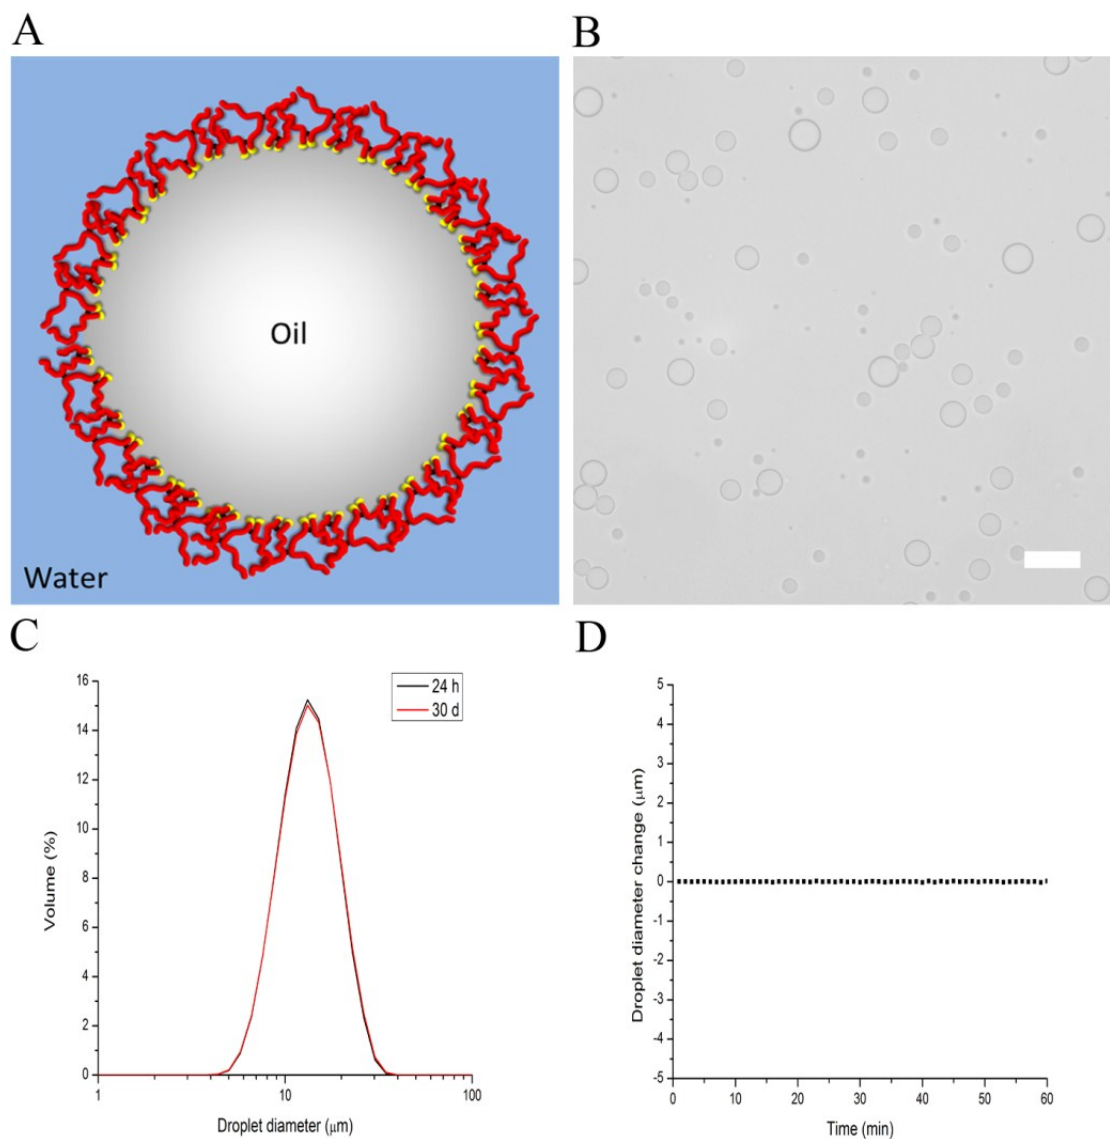

**Fig. S4** (A) Schematic representation of an oil/water emulsion droplet stabilised with BCP. The multiple hydrophobic chain ends of BCP, DDT (yellow), anchors at the oil phase, and the MAA domain (red) located at the aqueous phase provides electrostatic stabilisation. (B) Light micrograph of oil in water emulsion droplets stabilized with BCP. Scale bar represents 20  $\mu\text{m}$ . Laser diffraction chromatograms of (C) droplet size distribution at 24 h and 30 days at pH 10, and (D) droplet size diameter change over time at pH 10.

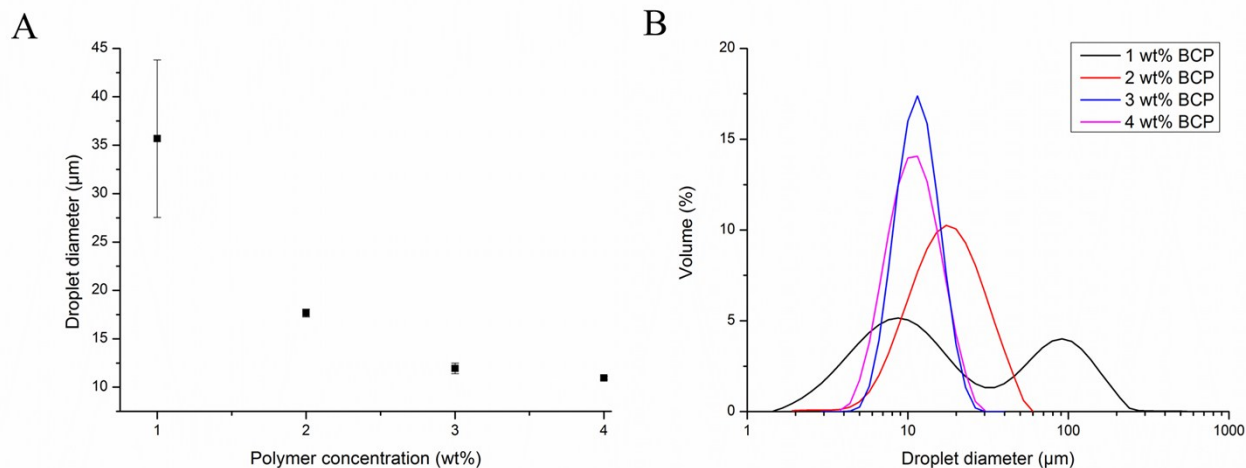

**Fig. S5** Laser diffraction chromatograms of emulsion droplets homogenized at 24 000 rpm with varying BCP concentration. (A) Droplet size diameter with varying BCP concentration at pH 10, and (B) droplet size distribution with varying BCP concentration at pH 10.

## 4. Characterization of Calcium Phosphate (CaP) Capsules

### 4.1. FTIR

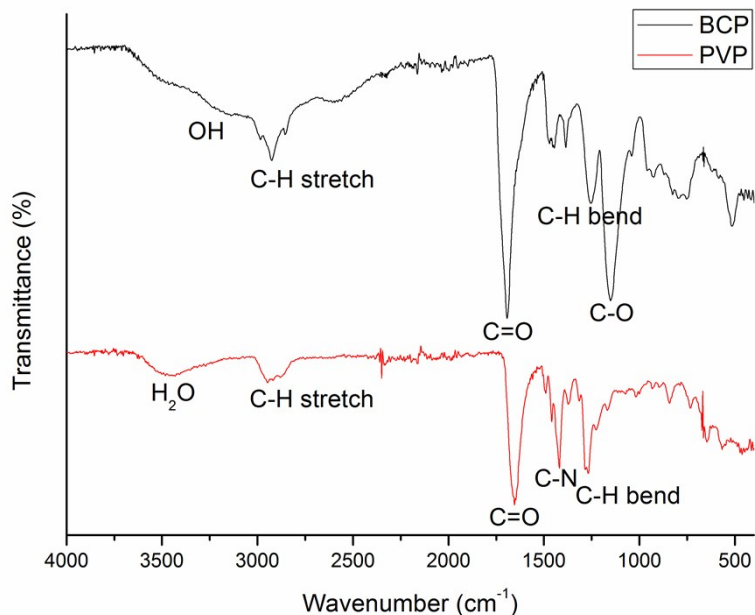

**Fig. S6** FTIR spectra of BCP and PVP.

## 4.2. ICP-OES

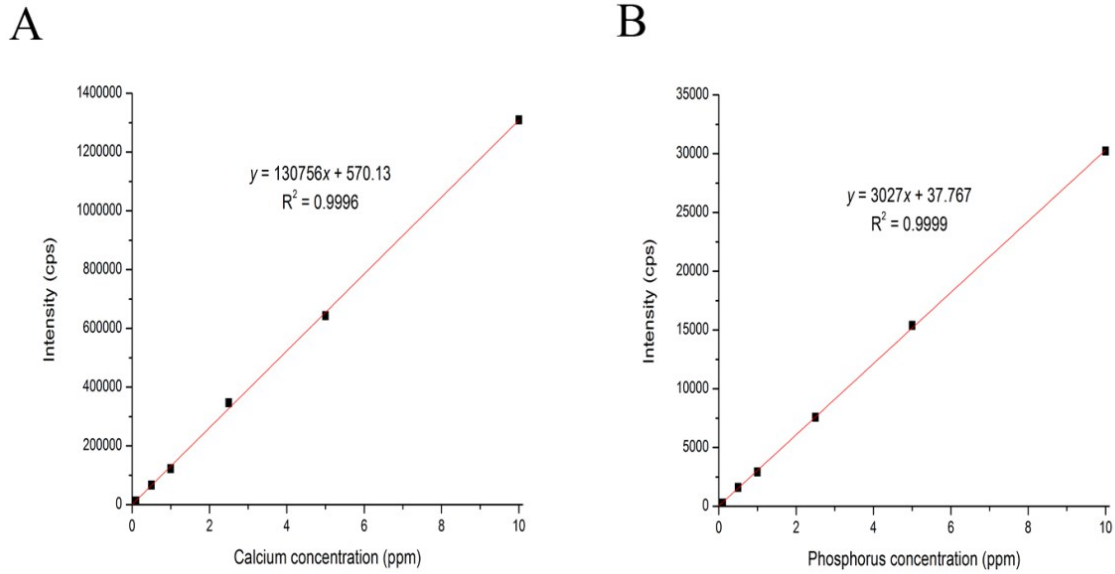

**Fig. S7** Calibration standards for (A) calcium and (B) phosphorus.

**Table S2** ICP-OES data for CaP capsules and synthetic hydroxyapatite.

| Sample                   | Calcium concentration (ppm) | Phosphorus concentration (ppm) | Ca/P molar ratio |
|--------------------------|-----------------------------|--------------------------------|------------------|
| CaP capsules             | 9.028 ( $\pm 0.026$ )       | 4.417 ( $\pm 0.030$ )          | 1.58             |
| Synthetic hydroxyapatite | 9.398 ( $\pm 0.036$ )       | 4.338 ( $\pm 0.010$ )          | 1.67             |

## 4.3. TGA

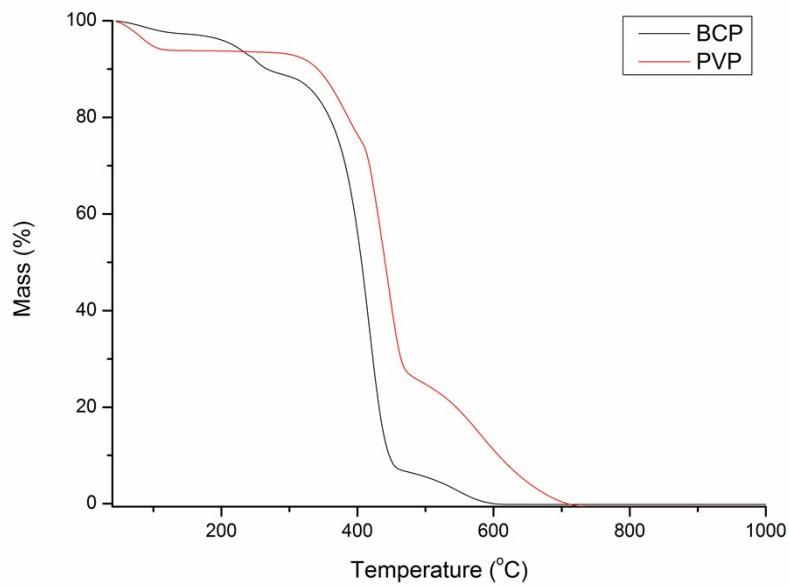

**Fig. S8** TG curves of BCP and PVP.

#### 4.4. XRD

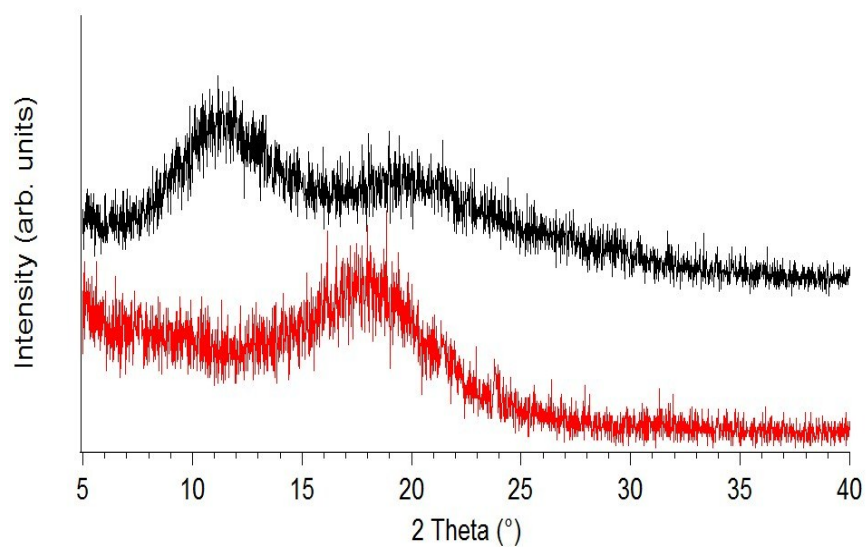

**Fig. S9** XRD patterns of PVP (black line), and BCP (red line).

#### 5. Fluorescent Capsules

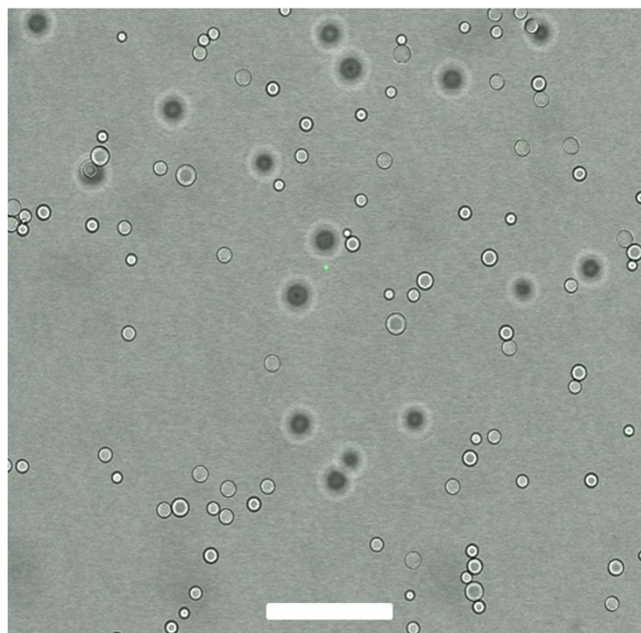

**Fig. S10** An overlay confocal micrograph of dodecane droplets stabilized with BCP with Fluo-BP. Scale bar represents 50  $\mu\text{m}$ .
